# Supplementary material for: Implementing Video Consultations in a Rural Psychiatric Outpatient Clinic: A Feasibility Study
Source: Hindawi journal article supplement (doi:10.1155/2023/4282468), 2023-11-16
Supplement: f1 [file 4282468.f1.docx]

| Independent t-tests comparing change scores between the IP and VC groups and analyses of covariance (ANCOVA) after adjusting for baseline test scores. | | | | | | | | |
| --- | --- | --- | --- | --- | --- | --- | --- | --- |
| **Variable** | **Group**  **(n)** | **Pre-test**  **(SD)** | **Post-test**  **(SD)** | **Mean change** | **t(27)** | **p** | **F(1,26)** | **P** |
| CSQ-8  (Satisfaction) | IP  (n=16) | 24.55  (3.94) | 27.63  (2.57) | 3.08 | 1.01 | .32 | 2.90 | .10 |
| VC  (n=13) | 23.42  (6.31) | 25.07  (5.83) | 1.65 |
| WAI-C  (Working  Alliance) | IP  (n=16) | 70.50  (8.43) | 73.68  (7.67) | 3.17 | .52 | .60 | .83 | .37 |
| VC  (n=13) | 62.29  (17.21) | 67.84  (11.51) | 5.55 |
| SCL-10  (Symptom  Distress) | IP  (n=16) | 52.18  (20.81) | 44.21  (22.81) | -7.96 | .36 | .71 | .36 | .54 |
| VC  (n=13) | 70.19  (14.41) | 59.61  (18.22) | -10.57 |
| WAI-T  (Working  Alliance) | IP (n=16)  VC=13 | 63.06  (10.10)  65  (6.64) | 67.83  (5.62)  60.53  (9,89) | 4.8  -4.5 | 3.60 | .001* | 14.16 | <.001* |
| *Note.*CSQ-8 = client-satisfaction questionnaire, WAI-C = working alliance inventory (client), SCL-10 = symptoms checklist., WAI-T= working alliance inventory (Therapist) | | | | | | | | |
